# Supplementary material for: Surfactant Intercalation in Li-Al-Based Binary and Ternary Layered Double Hydroxides by the Microwave-Assisted Rapid Ion-Exchange Process and Its Application in Iodine Adsorption
Source: MDPI journal article supplement (doi:10.3390/min13030303), 2023-02-21
Supplement: s1 [file s1]

Supplementary materials

# Surfactant intercalation in Li-Al based binary and ternary layered double hydroxides by the microwave-assisted rapid ion-exchange process and its application in iodine adsorption

Dileep Kumar Yadav, Sitharaman Uma, and Rajamani Nagarajan\*

Materials Chemistry Group, Department of Chemistry, University of Delhi, Delhi 110007, India

\* rnagarajan@chemistry.du.ac.in

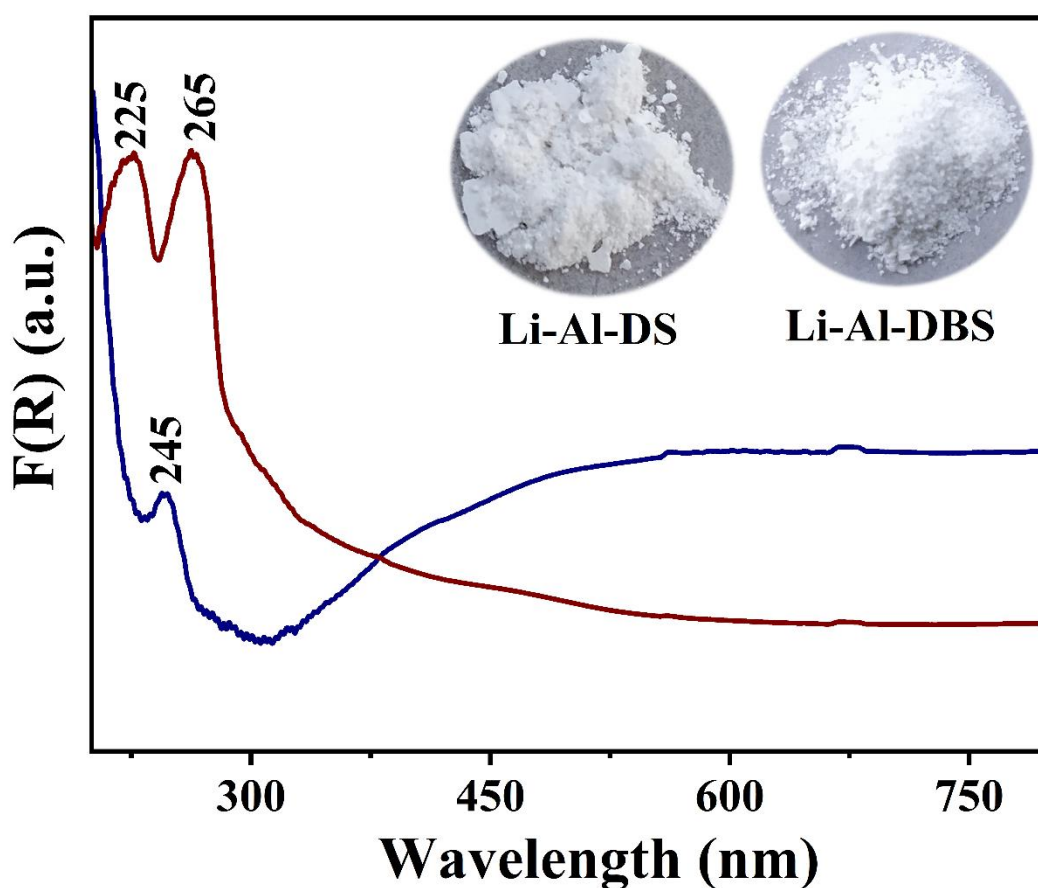

**Figure S1.** Diffuse reflectance spectra of Li-Al-DS (data in blue) and Li-Al-DBS (data in dark red) LDHs.

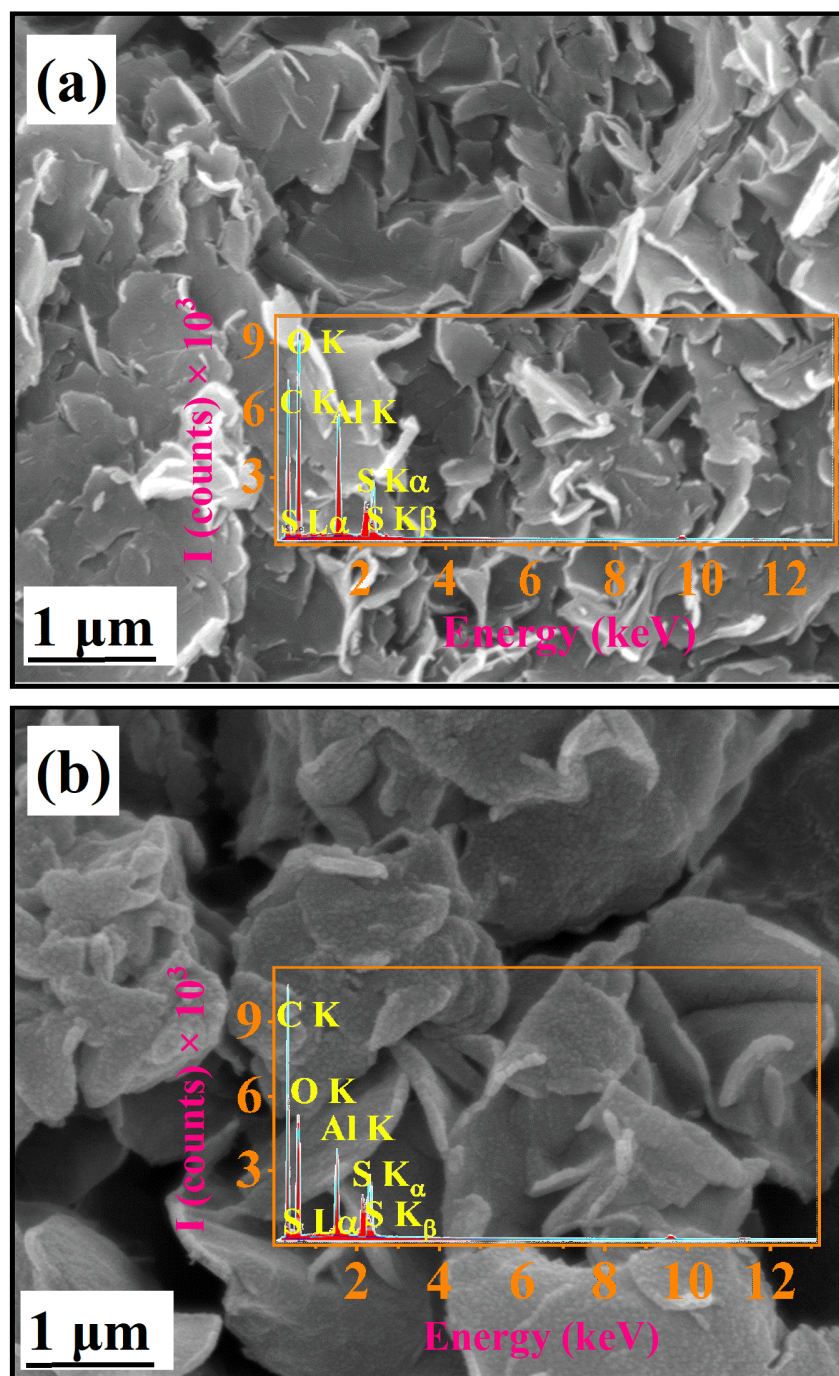

Figure S2. SEM micrographs and EDS analyses of (a) Li-Al-DS LDH and (b) Li-Al-DBS LDH.

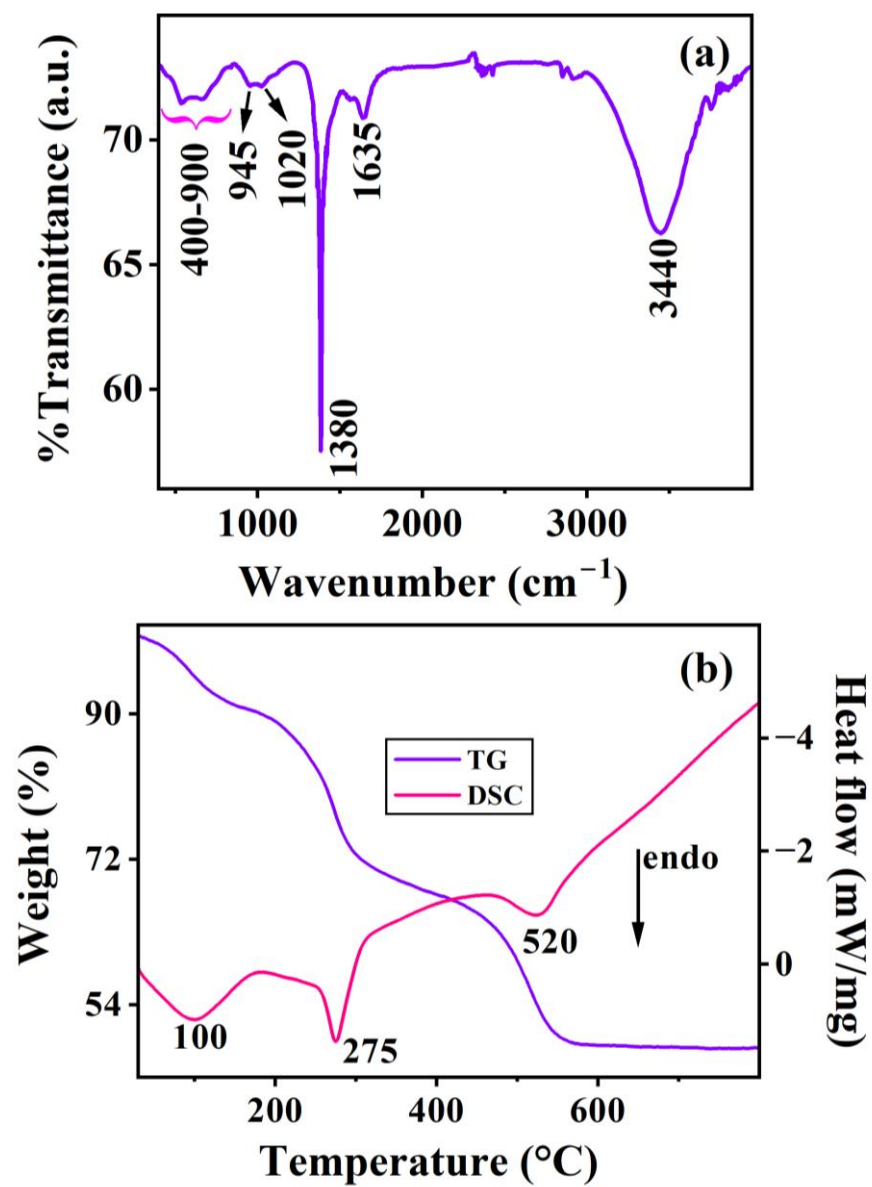

Figure S3. (a) FTIR spectrum and (b) TG-DSC traces of Li-Mg-Al- $\text{NO}_3$  LDH.

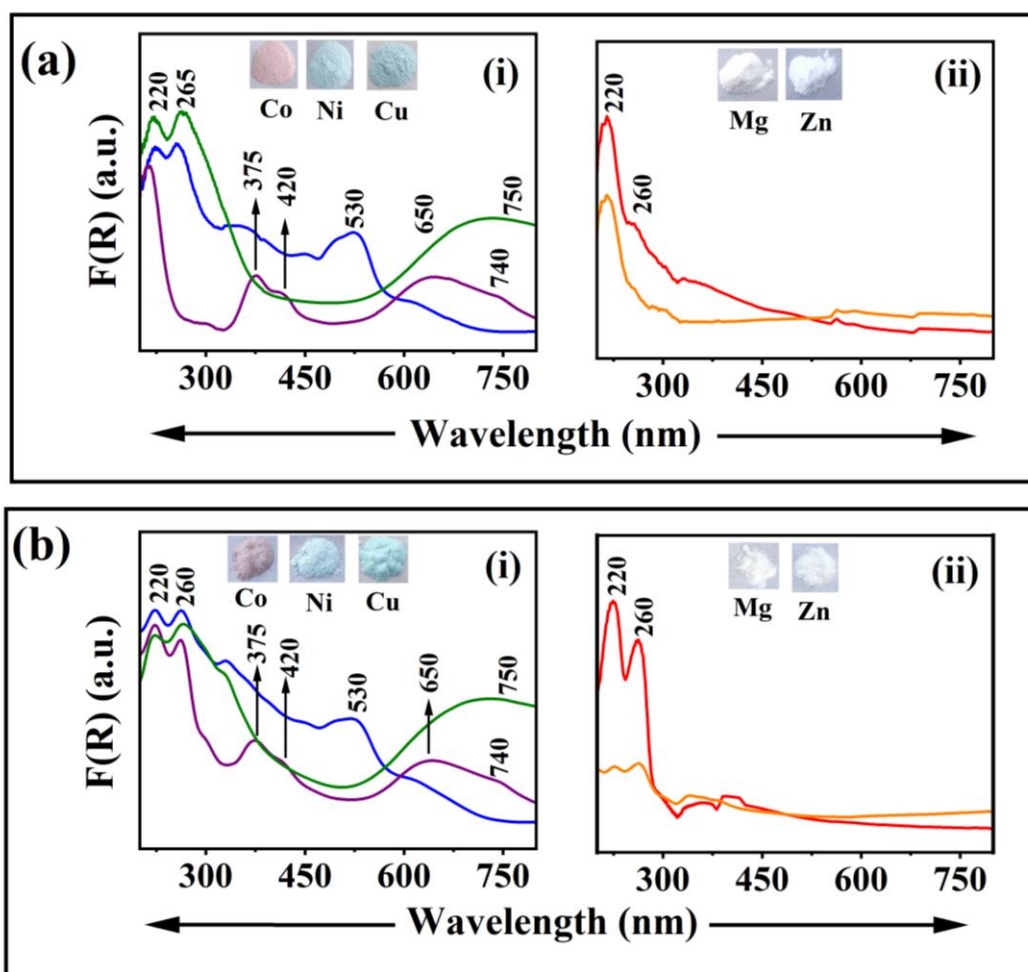

**Figure S4.** Diffuse reflectance spectra of (a) Li-M-Al-DS LDH and (b) Li-M-Al-DBS LDH [(i) M = Co (data in blue), Ni (data in purple), Cu (data in olive green) and (ii) M = Mg (data in red), Zn (data in orange)].



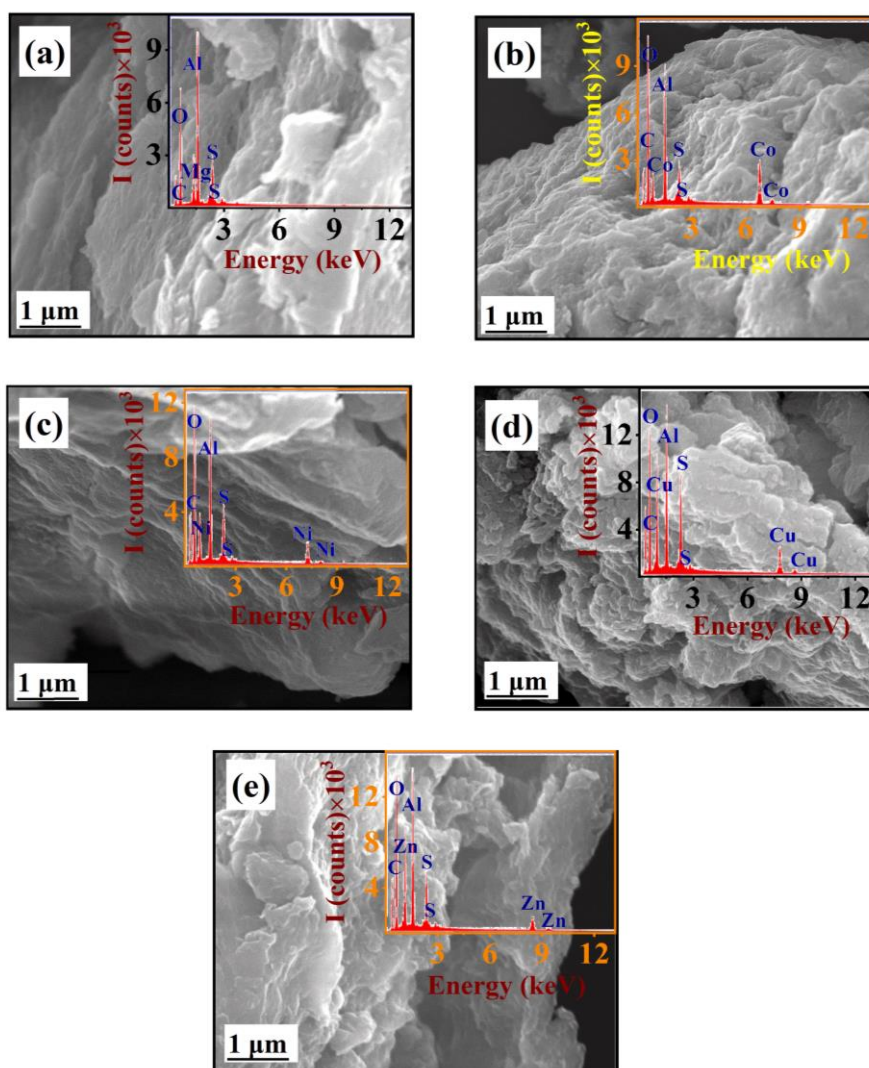

**Figure S5.** SEM micrographs and EDS analyses of Li-M-Al-DS LDH samples where M is (a) Mg, (b) Co, (c) Ni, (d) Cu, and (e) Zn.

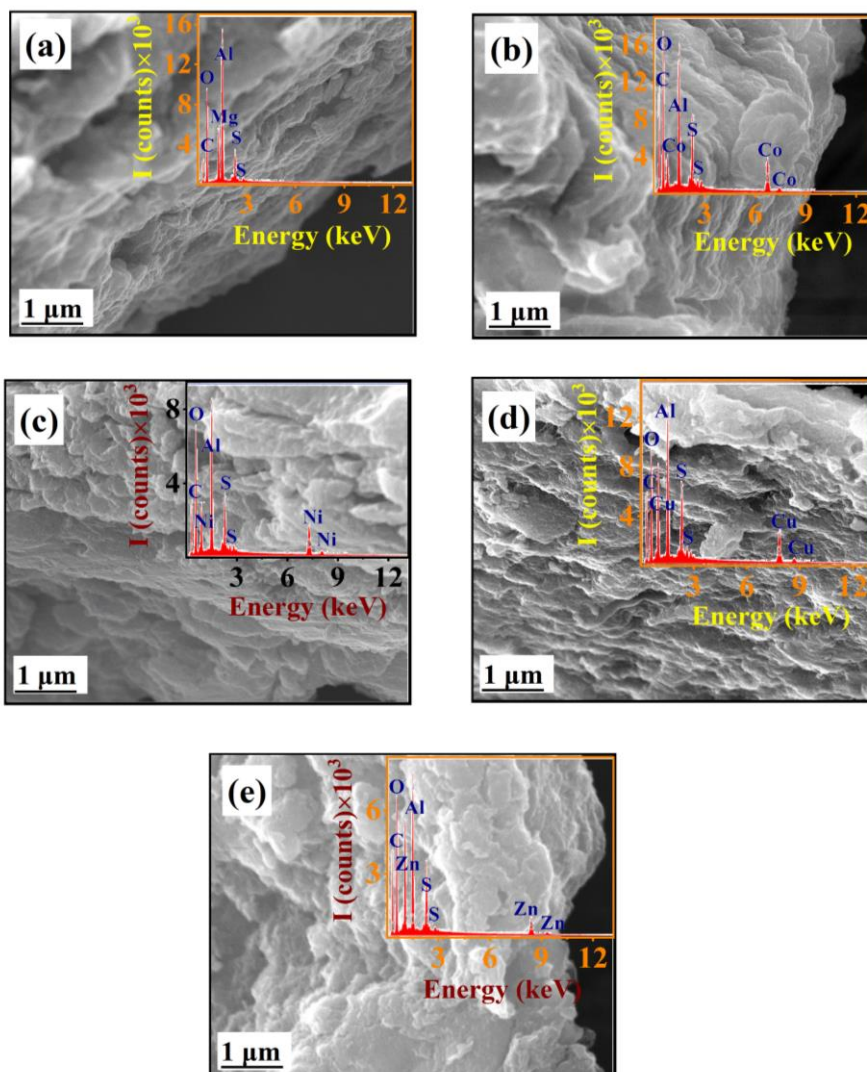

**Figure S6.** SEM images and EDS analyses of Li-M-Al-DBS LDH samples where M is (a) Mg, (b) Co, (c) Ni, (d) Cu, and (e) Zn.

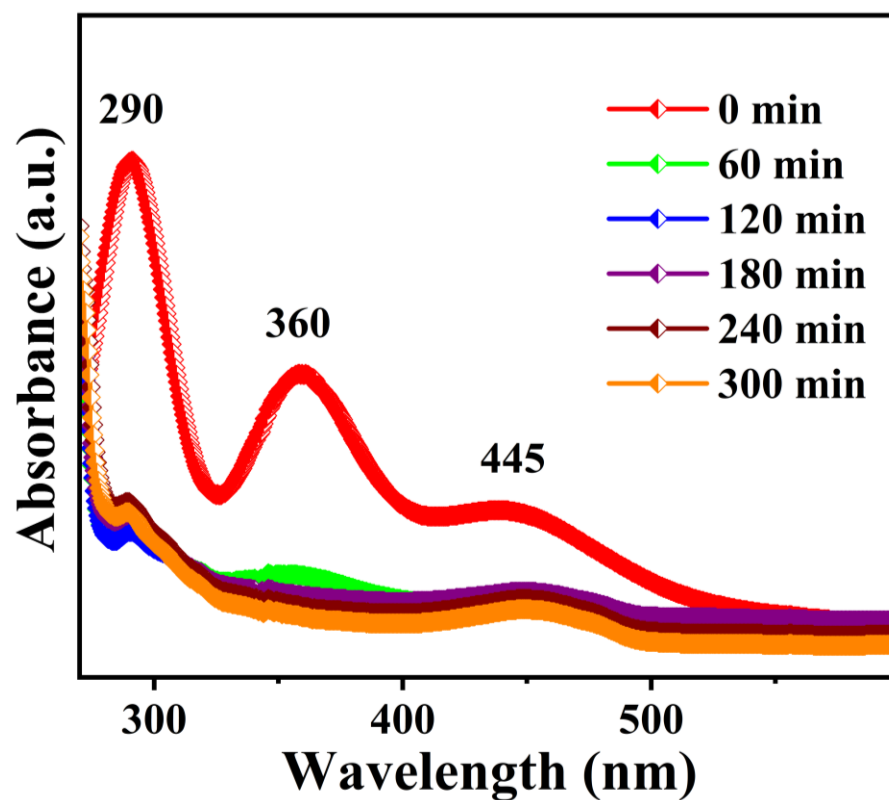

Figure S7. Time-dependent UV-visible spectra of 30 mL (25.4 mg/L) iodine solution in the presence of 50 mg Li-Al-DBS LDH sample.

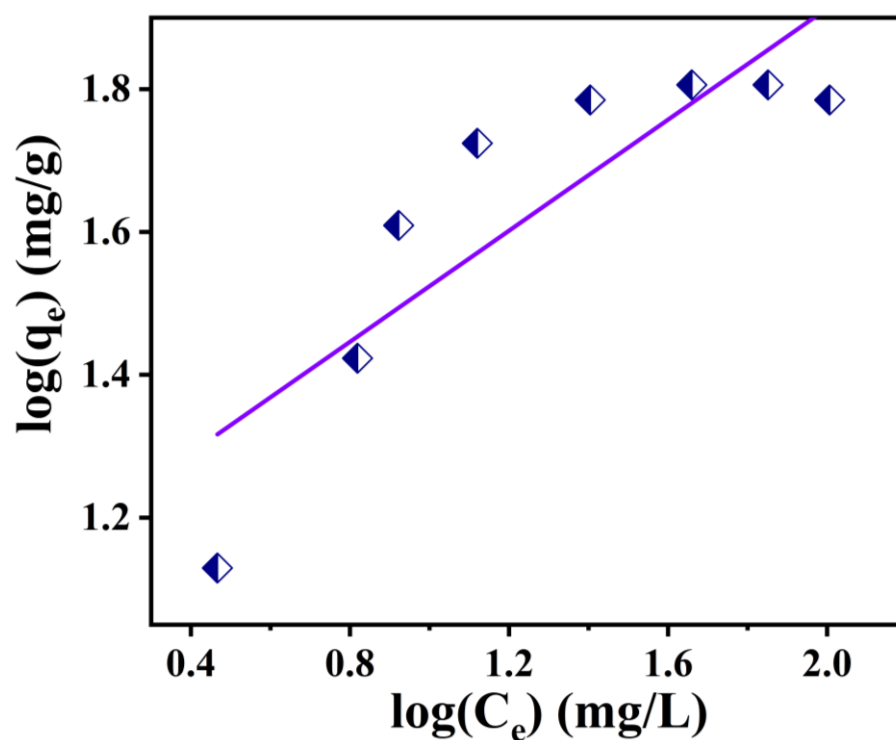

Figure S8. Plot of adsorption isotherm data fitted using Freundlich isotherm model for adsorption of iodine on Li-Al-DBS LDH sample.

**Table S1.** The content of elements in Li-Al-DS, Li-M-Al-DS (M = Mg, Co, Ni, Cu, and Zn), Li-Al-DBS, and Li-M-Al-DBS LDHs (M = Mg, Co, Ni, Cu, and Zn) obtained by C, H, N, and S analyses.

| LDHs         | C (%) | H (%) | N (%) | S (%) |
|--------------|-------|-------|-------|-------|
| Li-Al-DS     | 24.13 | 6.92  | 0.00  | 5.42  |
| Li-Mg-Al-DS  | 22.39 | 6.56  | 0.00  | 4.96  |
| Li-Co-Al-DS  | 23.52 | 6.56  | 0.00  | 4.85  |
| Li-Ni-Al-DS  | 22.20 | 6.05  | 0.00  | 5.08  |
| Li-Cu-Al-DS  | 24.49 | 6.59  | 0.00  | 5.75  |
| Li-Zn-Al-DS  | 21.55 | 5.95  | 0.00  | 4.96  |
| Li-Al-DBS    | 42.29 | 6.43  | 0.00  | 6.39  |
| Li-Mg-Al-DBS | 28.86 | 5.55  | 0.00  | 4.33  |
| Li-Co-Al-DBS | 24.07 | 5.57  | 0.00  | 4.16  |
| Li-Ni-Al-DBS | 25.53 | 5.73  | 0.00  | 4.18  |
| Li-Cu-Al-DBS | 28.19 | 6.43  | 0.00  | 5.12  |
| Li-Zn-Al-DBS | 27.42 | 5.69  | 0.00  | 4.39  |

**Table S2.** The content of elements in Li-Al-DS, Li-M-Al-DS, Li-Al-DBS, and Li-M-Al-DBS (M = Mg, Co, Ni, Cu, and Zn) LDHs (M = Mg, Co, Ni, Cu, and Zn) obtained by EDS analyses.

| LDHs         | Atomic percentage |      |      |     |     |     |     |     |     |
|--------------|-------------------|------|------|-----|-----|-----|-----|-----|-----|
|              | Al                | C    | O    | S   | Mg  | Co  | Ni  | Cu  | Zn  |
| Li-Al-DS     | 8.1               | 47.9 | 40.1 | 3.9 | -   | -   | -   | -   | -   |
| Li-Mg-Al-DS  | 9.9               | 37.5 | 44.7 | 3.4 | 4.4 | -   | -   | -   | -   |
| Li-Co-Al-DS  | 6.7               | 47.5 | 39.5 | 3.1 | -   | 3.2 | -   | -   | -   |
| Li-Ni-Al-DS  | 8.5               | 45.6 | 39.3 | 2.7 | -   | -   | 3.9 | -   | -   |
| Li-Cu-Al-DS  | 8.1               | 44.6 | 40.1 | 2.6 | -   | -   | -   | 4.6 | -   |
| Li-Zn-Al-DS  | 7.2               | 42.6 | 44.4 | 2.5 | -   | -   | -   | -   | 3.3 |
| Li-Al-DBS    | 7.1               | 62.2 | 27.3 | 3.4 | -   | -   | -   | -   | -   |
| Li-Mg-Al-DBS | 11.2              | 49.7 | 29.8 | 3.2 | 6.1 | -   | -   | -   | -   |
| Li-Co-Al-DBS | 10.1              | 52.9 | 27.8 | 3.7 | -   | 5.5 | -   | -   | -   |
| Li-Ni-Al-DBS | 9.1               | 50.7 | 31.5 | 3.6 | -   | -   | 5.1 | -   | -   |
| Li-Cu-Al-DBS | 8.4               | 54.7 | 28.3 | 3.9 | -   | -   | -   | 4.7 | -   |
| Li-Zn-Al-DBS | 7.5               | 56.5 | 29.2 | 3.1 | -   | -   | -   | -   | 3.7 |

**Table S3.** Iodine adsorption capacity of various LDHs used as adsorbents in the present work and references.

| S.No. | Adsorbents                 | Iodine state                           | T (°C) | Capacity (mg/g) | References |
|-------|----------------------------|----------------------------------------|--------|-----------------|------------|
| 1.    | Li-Al-DBS-LDH              | I <sub>2</sub> solution in methanol    | R. T.  | 63.96           | This work  |
| 2.    | Mg-Al-NO <sub>3</sub> -LDH | I <sub>2</sub> solution water          | R. T.  | 10.1            | [54]       |
| 3.    | Ni-Ti-S <sub>x</sub> -LDH  | I <sub>2</sub> solution in cyclohexane | R. T.  | 527.4           | [44]       |
| 4.    | Bi-Zn-Al-LDH               | I <sub>2</sub> (g)                     | 75     | 433             | [55]       |
